# Supplementary material
Source: publisher figshare collection journal article supplement (https://gsajournals.figshare.com/ndownloader/files/12955034)
Supplement: Supplementary file 1 [file 12955034]

Table S1: Details on Drosophila lines used in the study.;;;;
;;;;
Stock number;Gene;FlyBase Genotype;Description;Background
BL4414;Actin;Actin5c-Gal4;Ubiquitous driver;NA
NA;Daughterless;"da-Gal4; ubi-Gal80TS";Ubiquitous driver;NA
BL264;--;cn1 bw1;Background;NA
BL31433;trpl;cn1 trpl302 bw1;Mutant;264
BL11412;Dscam1;"P{PZ}Dscam105518 cn1/CyO; ry506";Mutant;264
W1118;W1118;W1118;Background;NA
BL30027;fru;"w1118; P{GawB}fruNP0021";Mutant;W1118
BL52275;trpl;"w*; P{UAS-trpl.Z}3/TM3, Sb1";overexpression;W1118
BDSC36303;Attp2;"y v; attP2, y+";Background;NA
;;;;
;;;;
BL26722;trpl;"y1 v1; P{TRiP.JF02264}attP2";RNAi;Attp2
BL29547;olf413;"y1 v1; P{TRiP.JF02439}attP2";RNAi;Attp2
BL31593;fru;"y1 v1; P{TRiP.JF01182}attP2";RNAi;Attp2
BL38945;Dscam1;"y1 sc* v1; P{TRiP.HMS01859}attP2/TM3, Sb1";RNAi;Attp2
BL32337;CG7627;"y1 sc* v1; P{TRiP.HMS00328}attP2";RNAi;Attp2
BL35790;tou;"y1 sc* v1; P{TRiP.GL00397}attP2";RNAi;Attp2
BL33887;Cyp6a17;"y1 sc* v1; P{TRiP.HMS00825}attP2";RNAi;Attp2
;;;;
;;;;
BDSC36303;Attp40;"y v; attP40, y+";Background;NA
;;;;
;;;;
BL53963;Cyp6a22;"y1 v1; P{TRiP.HMJ21345}attP40";RNAi;Attp40
VDRC60101;none;40D-UAS;Background;KK control
VDRC100143;Cyp6a9;P{KK105012}VIE-260B;RNAi;KK control
VDRC105781;Cyp6a19;P{KK110388}VIE-260B;RNAi;KK control
VDRC100679;Cyp6a23;P{KK107215}VIE-260B;RNAi;KK control
VDRC60000;W1118;W1118;Background;GD control
VDRC3313;Cyp6a20;"w1118; P{GD1184}v3313";RNAi;GD control
VDRC4880;Cyp6a23;"w1118; P{GD2001}v4880";RNAi;GD control
13598;Cyp6a17;NA;Mutant;W1118
;;;;
List of D. melanogaster genotypes. Stock number refers to the Bloomington or VDRC stock center numbers.;;;;
